# Supplementary material for: Effect of stereoisomerism of the alkyl chain on the gas sensing properties based on perylene dyes
Source: Royal Society of Chemistry journal article supplement (doi:10.1039/c4tc02649g), 2015-01-01
Supplement: c4tc02649g1.pdf [file c4tc02649g1.pdf]

## Electronic Supplementary Information for

Effect of stereoisomerism of alkyl chain on the gas sensing  
properties based on perylene dyes

Chunli Li,<sup>b</sup> Haiyan Zhai,<sup>a</sup> Xiaotian Liu<sup>c</sup>, Weiguang Zhang<sup>a</sup> and Yongwei Huang<sup>\*a</sup>

<sup>a</sup> *Medical College, Henan University, Kaifeng 475004, China*

<sup>b</sup> *Key Laboratory for Special Functional Materials of Ministry of Education,  
Henan University, Kaifeng 475004, China*

<sup>c</sup> *College of Chemistry and Chemical Engineering, Henan University, Kaifeng 475004, China.*

## 1. Synthesis of OT, ROT and SOT

### ***N, N'*-bis(*n*-dodecyl)-1,7-di(1-Octyn-3-ol ) perylene-3,4:9,10-tetracarboxyldiimide (OT)**

*N, N'*-bis(*n*-dodecyl)-1,7-dibromoperylene-3,4:9,10-tetracarboxyldiimide (100 mg, 0.11 mmol), 1-Octyn-3-ol (85.56 mg, 0.68 mmol), [Pd(PPh<sub>3</sub>)<sub>4</sub>] (13 mg, 0.01 mmol), CuI (2.2 mg, 0.01 mmol) were stirred in a mixture of 13.5 mL of triethylamine and 13.5 mL of THF for 14 h at 53 °C under argon atmosphere. The mix was cooled to room temperature and diluted with CH<sub>2</sub>Cl<sub>2</sub>. The organic layer was extracted with water washing to neutral, dried with Na<sub>2</sub>SO<sub>4</sub>, and the solvent was evaporated under vacuum. The residue was purified by column chromatography on silica gel (methanol/CHCl<sub>3</sub>, 2:98) to yield the brown product 60 mg (56%). <sup>1</sup>H-NMR (CDCl<sub>3</sub>, 400MHz) δ (ppm): 0.3~2.37 (m, 68 H), 4.07~5.15 (m, 8 H), 8.17~8.92 (m, 4 H), 9.67~9.69 (d, *J* = 8.0, 2 H). MS (MALDI-TOF): calcd for C<sub>64</sub>H<sub>82</sub>N<sub>2</sub>O<sub>6</sub>, 974.62 m/z, found 974.31. Anal. Calcd for C<sub>64</sub>H<sub>82</sub>N<sub>2</sub>O<sub>6</sub>: C, 78.81; H, 8.47; N, 2.87. Found: C, 78.65; H, 8.96; N, 2.91.

### ***N, N'*-bis(*n*-dodecyl)-1,7-di(*R*)-1-Octyn-3-ol ) perylene-3,4:9,10-tetracarboxyldiimide (ROT)**

*N, N'*-bis(*n*-dodecyl)-1,7-dibromoperylene-3,4:9,10-tetracarboxyldiimide (200 mg, 0.23 mmol), (*R*)-1-octyn-3-ol (125 mg, 0.95 mmol), [Pd(PPh<sub>3</sub>)<sub>4</sub>] (26 mg, 0.02 mmol), CuI (4.3 mg, 0.02 mmol) were stirred in a mixture of 13.5 mL of triethylamine and 13.5 mL of THF for 14 h at 53 °C under argon atmosphere. The mix was cooled to room temperature and diluted with CH<sub>2</sub>Cl<sub>2</sub>. The organic layer was extracted with water washing to neutral, dried with Na<sub>2</sub>SO<sub>4</sub>, and the solvent was evaporated under vacuum. The residue was purified by column chromatography on silica gel (methanol/CHCl<sub>3</sub>, 2:98) to yield the brown product 140 mg (63%). <sup>1</sup>H-NMR (CDCl<sub>3</sub>, 400MHz) δ (ppm): 0.3~2.60 (m, 68 H), 4.07~5.17 (m, 8 H), 8.37~9.02 (m, 4 H), 9.91~9.92 (d, *J* = 8.0, 2 H). MS (MALDI-TOF): calcd for C<sub>64</sub>H<sub>82</sub>N<sub>2</sub>O<sub>6</sub>, 974.62 m/z, found 974.41. Anal. Calcd for C<sub>64</sub>H<sub>82</sub>N<sub>2</sub>O<sub>6</sub>: C, 78.81; H, 8.47; N, 2.87. Found: C, 78.75; H, 8.66; N, 2.71.

### ***N, N'*-bis(*n*-dodecyl)-1,7-di(*S*)-1-Octyn-3-ol ) perylene-3,4:9,10-tetracarboxyldiimide (SOT)**

*N, N'*-bis(*n*-dodecyl)-1,7-dibromoperylene-3,4:9,10-tetracarboxyldiimide (200 mg, 0.23 mmol), (*S*)-1-octyn-3-ol (125 mg, 0.95 mmol), [Pd(PPh<sub>3</sub>)<sub>4</sub>] (26 mg, 0.02 mmol), CuI (4.3 mg, 0.02 mmol) were stirred in a mixture of 13.5 mL of triethylamine and 13.5 mL of THF for 14 h at 53 °C under argon atmosphere. The mix was cooled to room temperature and diluted with CH<sub>2</sub>Cl<sub>2</sub>. The organic layer was extracted with water washing to neutral, dried with Na<sub>2</sub>SO<sub>4</sub>, and the solvent was evaporated under vacuum. The residue was purified by column chromatography on silica gel (methanol/CHCl<sub>3</sub>, 2:98) to yield the brown product 163 mg (73%). <sup>1</sup>H-NMR (CDCl<sub>3</sub>, 400MHz) δ (ppm): 0.2~2.34 (m, 68 H), 4.09~5.17 (m, 8 H), 8.12~8.86 (m, 4 H), 9.65~9.69 (d, *J* = 7.8, 2 H). MS (MALDI-TOF): calcd for C<sub>64</sub>H<sub>82</sub>N<sub>2</sub>O<sub>6</sub>, 974.62 m/z, found 974.61. Anal. Calcd for C<sub>64</sub>H<sub>82</sub>N<sub>2</sub>O<sub>6</sub>: C, 78.81; H, 8.47; N, 2.87. Found: C, 78.89; H, 8.42; N, 2.68.

## 2. Methods

UV-vis adsorption spectra were recorded on Perkin-Elmer Lambda 950 UV-vis spectroscopy.  $^1\text{H}$  NMR was acquired using a Bruker 400 MHz NMR spectrometer. The X-ray diffraction patterns of these OT, ROT and SOT films were determined on a Japan Rigaku D/max-2500 rotation anode X-ray diffractometer equipped with graphite monochromatized Cu  $K\alpha$  radiation ( $\lambda = 1.5418 \text{ \AA}$ ). The surface morphologies of thin film from THF solutions ( $0.5 \text{ mg}\cdot\text{mL}^{-1}$ ) on Si substrates were observed on a Nanoscope IIIa Atomic Force Microscopy (AFM) in tapping mode. CD measurements were conducted on a JASCOJ-810 spectrometer at room temperature. In the process of measuring CD spectra, the film on the quartz plate was placed perpendicular to the light path and continuously rotated within the film plane, using a custom-built attachment to avoid possible linear dichroism (LD) in the films. The film thickness was examined by KLa-Ten Alpha-step D-120 stylus profiler. OT, ROT and SOT devices were fabricated as shown below. Firstly, highly doped *n*-type Si (100) wafers ( $< 0.004 \text{ } \Omega \text{ cm}$ ) were used as substrates, and a 500 nm  $\text{SiO}_2$  layer (capacitance per unit area  $C_i = 7.5 \text{ nF cm}^{-2}$ ) as a gate dielectric was thermally grown onto the Si substrates. These wafers were cleaned in piranha solution, a 7:3 mixture of  $\text{H}_2\text{SO}_4$  and  $\text{H}_2\text{O}_2$ , rinsed with deionized water, and then dried by  $\text{N}_2$  stream. Then, the THF solutions of OT, ROT and SOT were transferred to Si/ $\text{SiO}_2$  substrates by spin-coating, followed drying in air, and the semiconductor film as sensitive layer was obtained. Finally, drain and source electrodes for current (I)-time (t) measurement were fabricated by vapor depositing Au ( $5 \times 10^{-5} \text{ Torr}$ ,  $0.5 \text{ \AA/s}$ ,  $\sim 50 \text{ nm}$  thick) onto films with a shadow mask to obtain devices with a channel width of  $0.5\text{-}1 \text{ } \mu\text{m}$  and length of  $5 \text{ mm}$ . The device was put into the test chamber having a volume of  $2 \text{ L}$ . The current variations were recorded at  $25 \text{ }^\circ\text{C}$  in vacuum with a Keithley 4200-SCS system until the current reached a steady value. Then a certain amount of hydrazine was injected into the test chamber. The response was defined as the ration of  $I/I_0$ , where  $I$  and  $I_0$  represented the current flowing through films on exposure to hydrazine vapor and in vacuum, respectively.

## 2. Supporting Figures

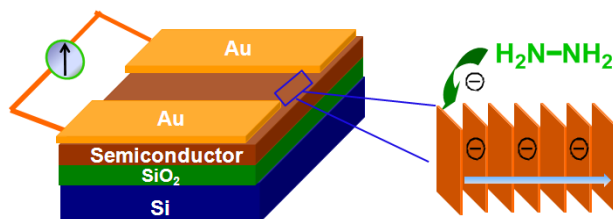

**Fig. S1** Schematic for the electron transport along the long-axis of OT, ROT and SOT films in hydrazine vapor.

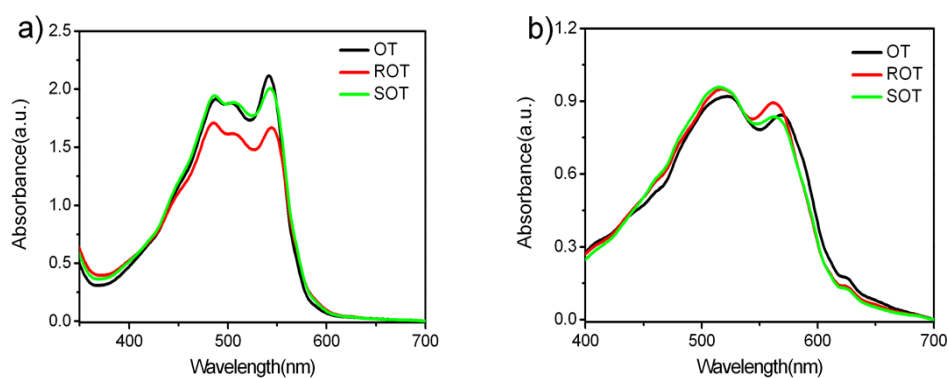

**Fig. S2** Normalized UV-vis spectra of OT, ROT and SOT (a) in THF solution and (b) in films.

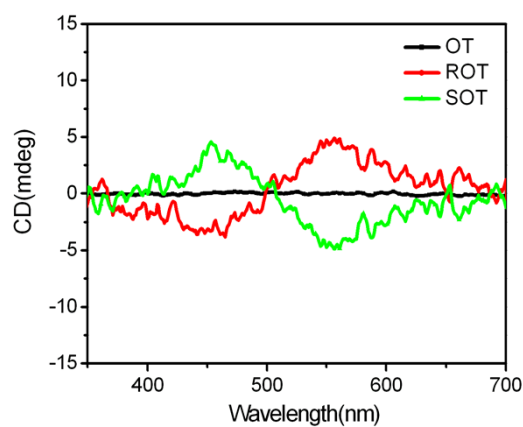

**Fig. S3** The CD spectra for OT, ROT and SOT films.
